# Supplementary material
Source: publisher site journal article supplement (https://www.dovepress.com/article/328864)
Supplement: Supplementary file 1 [file get_supplementary_file.php]

**Divya-Herbal-Peya Decoction Harmonizes the Inflammatory Response in Lipopolysaccharide-Induced Zebrafish Model**

Acharya Balkrishna1,2,5, Savita Lochab3, Monali Joshi4, Jyotish Srivastava4, and Anurag Varshney1,2,6*

1Drug Discovery and Development Division, Patanjali Research Institute, NH-58, Haridwar 249405, Uttarakhand, India.

2Department of Allied and Applied Sciences, University of Patanjali, Patanjali Yog Peeth, Roorkee-Haridwar Road, Haridwar 249405, Uttarakhand, India.

3Department of Biology, Patanjali Research Institute, NH-58, Haridwar 249405, Uttarakhand, India.

4Department of Chemistry, Patanjali Research Institute, NH-58, Haridwar 249405, Uttarakhand, India.

5Patanjali Yog Peeth (UK) Trust, 40 Lambhill Street, Kinning Park, Glasgow G41 1AU, UK

6Special Centre for Systems Medicine, Jawaharlal Nehru University, New Delhi, India

*Correspondence:

Dr. Anurag Varshney

Drug Discovery and Development Division,

Patanjali Research Institute, NH-58,

Haridwar 249405, Uttarakhand, India

Email: [anurag@prft.co.in](mailto:anurag@prft.co.in)

**Supplementary**

**Table S1: Quality check analysis of Divya-Herbal-Peya (Batch # B-DHP109) as per the guidelines in “General Guidelines for Drug Development of Ayurvedic Formulations, First Edition-2018” issued by Central Council for Research in Ayurvedic Sciences, Ministry of AYUSH, Government of India**1**.**

| PARAMETER | STANDARD LIMIT | OBSERVED VALUES | RESULT |
| --- | --- | --- | --- |
| Microbial Limit Test |  |  |  |
| TAMC | NMT# 10⁵ cfu/gm | 19350 | Complies |
| TY&MC | NMT# 10ᵌ cfu/gm | 770 | Complies |
| Test for Pathogens |  |  |  |
| *Escherichia coli* | Absent/ gm | Absent | Complies |
| *Staphylococcus aureus* | Absent/gm | Absent | Complies |
| *Pseudomonas aeruginosa* | Absent/gm | Absent | Complies |
| *Salmonella sp.* | Absent/gm | Absent | Complies |
| Heavy Metals |  |  |  |
| Lead | < 10ppm | 0.787 | Complies |
| Arsenic | <3.0ppm | 0.199 | Complies |
| Mercury | <1.0ppm | 0.781 | Complies |
| Cadmium | <0.3ppm | 0.077 | Complies |
| Test for Pesticide Residue |  |  |  |
| Organo-chloro group | <1.0ppm | <1.0 | Complies |
| Aflatoxins |  |  |  |
| B1 | <0.5ppm | <0.0005 | Complies |
| G1 | <0.5ppm | <0.0005 | Complies |
| B2 | <0.1ppm | <0.0005 | Complies |
| G2 | <0.1ppm | <0.0005 | Complies |

# NMT: Not more than

**
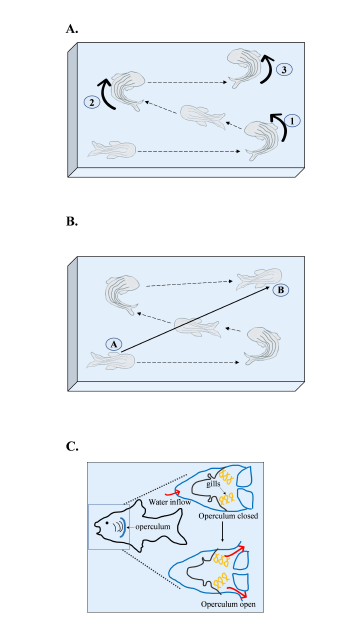
**

**Figure 1S: Pictorial representation of behavioural activities in zebrafish model.**

(A). Pictorial representation of the top view of study tank, showing fish movement from point A to B. Displacement for individual zebrafish was calculated by recording the distance between point A and B (in mm). Further calculations were performed on by dividing displacement by time (s) taken to attain that dis-placement in order to obtain the velocity (mm/sec) for each zebrafish. (B). Pictorial diagram showing the swim path of zebrafish. For 3 consecutive min the turns (shown with bold black arrow) taken by each zebrafish were recorded. (C). Pictorial representation showing phenotypic position of operculum in zebrafish. Operculum is closed when fish take up water inside the buccal cavity but development of pressure opens up the operculum to allow exit of water. The opening and closing of operculum lead to operculum movement which is noticeable phenotypically. These operculum movements are recorded as opercular beat.

**Reference**

1. General Guidelines for Drug Development. https://www.ayush.gov.in
